# Supplementary material for: MRPrimerW2: an enhanced tool for rapid design of valid high-quality primers with multiple search modes for qPCR experiments
Source: PubMed Central journal article supplement — Nucleic Acids Res. 2019 May 2;47(W1):W614–22. doi: 10.1093/nar/gkz323 (PMC6602510; doi:10.1093/nar/gkz323), 2019-05-02
Supplement: gkz323_supplemental_file.pdf [file gkz323_supplemental_file.pdf]

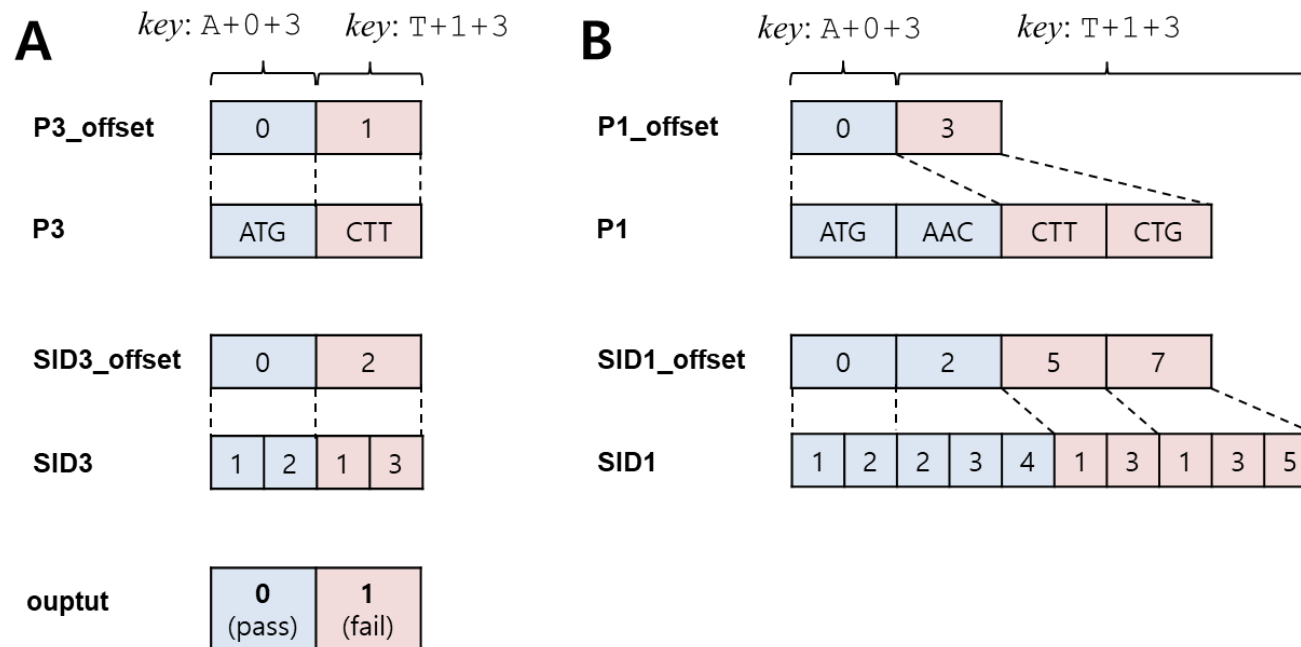

**Figure S1. Arrays for GPU computation in MRPrimerW2.** There are four arrays, P3, P3\_offset, SID3, SID3\_offset, by grouping the output of Step 3 by using seed+offset+|P| as a grouping key (A). Likewise, there are four arrays, P1, P1\_offset, SID1, SID1\_offset, by grouping the output of Step 1 by using the same grouping key (B). There are two groups of A+0+3 (blue color) and T+1+3 (red color). The first group means the seed "A" occurs at the offset 0 in the candidate primer "ATG" in the output of Step 3, which again occurs in the sequence IDs {1, 2} (A). It also means the seed "A" occurs at the offset 0 in the subsequence "AAC" in the output of Step 1, which again occurs in the sequence IDs {2, 3, 4} (B). Since "ATG" in P3 is quite different from "AAC" in P1 (i.e., two mismatches), "ATG" passes homology test, i.e., the corresponding element value in the output array becomes 0. However, in the second group, "CTT" in P3 is similar with "CTG" in P1 (i.e., single mismatch), and at the same time, the sequence IDs {1,3} where "CTT" occurs are different from the sequence IDs {1,3,5} where "CTG" occurs. That means "CTT" in P3 may amplify the off-target sequence {5}. Thus, the corresponding element value of "CTT" in the output array becomes 1 (fail).

**A**

| key                                  | value                                                                                                            |
|--------------------------------------|------------------------------------------------------------------------------------------------------------------|
| SID:sid <sub>0</sub>                 | symbol <sub>0</sub> +geneID <sub>0</sub> +accession <sub>0</sub> +synonym <sub>0</sub> +description <sub>0</sub> |
| symbol:symbol <sub>0</sub>           | sid <sub>0</sub> +geneID <sub>0</sub> +accession <sub>0</sub>   sid <sub>n</sub> +...                            |
| geneID:geneID <sub>0</sub>           | sid <sub>0</sub> +symbol <sub>0</sub> +accession <sub>0</sub>   sid <sub>n</sub> +...                            |
| accession:accession <sub>0</sub>     | sid <sub>0</sub> +symbol <sub>0</sub> +geneID <sub>0</sub>                                                       |
| synonym:synonym <sub>0</sub>         | sid <sub>0</sub> +symbol <sub>0</sub> +geneID <sub>0</sub> +accession <sub>0</sub>   sid <sub>n</sub> +...       |
| description:description <sub>0</sub> | sid <sub>0</sub> +symbol <sub>0</sub> +accession <sub>0</sub>   sid <sub>n</sub> +...                            |
| exon:sid <sub>0</sub>                | exon <sub>0_0</sub>   exon <sub>0_1</sub>   exon <sub>0_2</sub>   ...                                            |
| ⋮                                    |                                                                                                                  |

**B**

| key                                             | value                                                                                                                   |
|-------------------------------------------------|-------------------------------------------------------------------------------------------------------------------------|
| sid <sub>0</sub> +primer_length <sub>0</sub>    | primer <sub>0</sub> +sid <sub>0</sub> +pos <sub>0</sub>   primer <sub>n</sub> +sid <sub>0</sub> +pos <sub>n</sub>   ... |
| sidset <sub>1</sub> +primer_length <sub>1</sub> | primer <sub>1</sub> +sid <sub>1</sub> +pos <sub>1</sub>   primer <sub>m</sub> +sid <sub>m</sub> +pos <sub>m</sub>   ... |
| ⋮                                               |                                                                                                                         |

**C**

| key                 | value                                                                                                                                                   |
|---------------------|---------------------------------------------------------------------------------------------------------------------------------------------------------|
| sid <sub>0</sub>    | f_primer <sub>0</sub> +r_primer <sub>0</sub> +sid <sub>0</sub> +f_pos <sub>0</sub> +r_pos <sub>0</sub> +score <sub>0</sub>   f_primer <sub>n</sub> +... |
| sidset <sub>1</sub> | f_primer <sub>1</sub> +r_primer <sub>1</sub> +sid <sub>1</sub> +f_pos <sub>1</sub> +r_pos <sub>1</sub> +score <sub>1</sub>   f_primer <sub>m</sub> +... |
| ⋮                   |                                                                                                                                                         |

**D**

| key                 | value                                                                                                                           |
|---------------------|---------------------------------------------------------------------------------------------------------------------------------|
| sid <sub>0</sub>    | taqman <sub>0_0</sub> +sid <sub>0</sub> +pos <sub>0_0</sub>   taqman <sub>0_1</sub> +sid <sub>0</sub> +pos <sub>0_1</sub>   ... |
| sidset <sub>1</sub> | taqman <sub>1_0</sub> +sid <sub>1</sub> +pos <sub>1_0</sub>   taqman <sub>1_1</sub> +sid <sub>1</sub> +pos <sub>1_1</sub>   ... |
| ⋮                   |                                                                                                                                 |

**E**

| key                 | value                                                                                                                                                                                                                                                                                                                                                                      |
|---------------------|----------------------------------------------------------------------------------------------------------------------------------------------------------------------------------------------------------------------------------------------------------------------------------------------------------------------------------------------------------------------------|
| sid <sub>0</sub>    | minLen <sub>0</sub> +maxLen <sub>0</sub> +minTm <sub>0</sub> +maxTm <sub>0</sub> +minGC <sub>0</sub> +maxGC <sub>0</sub> +minSC <sub>0</sub> +maxSC <sub>0</sub><br>+minEndSC <sub>0</sub> +maxEndSC <sub>0</sub> +minContiguous <sub>0</sub> +maxContiguous <sub>0</sub> +minStab <sub>0</sub><br>+maxStab <sub>0</sub> +minHairpin <sub>0</sub> +maxHairpin <sub>0</sub> |
| sidset <sub>1</sub> | minLen <sub>1</sub> +maxLen <sub>1</sub> +minTm <sub>1</sub> +maxTm <sub>1</sub> +minGC <sub>1</sub> +maxGC <sub>1</sub> +minSC <sub>1</sub> +maxSC <sub>1</sub><br>+minEndSC <sub>1</sub> +maxEndSC <sub>1</sub> +minContiguous <sub>1</sub> +maxContiguous <sub>1</sub> +minStab <sub>1</sub><br>+maxStab <sub>1</sub> +minHairpin <sub>1</sub> +maxHairpin <sub>1</sub> |
| ⋮                   |                                                                                                                                                                                                                                                                                                                                                                            |

**F**

| key              | value                                                 |
|------------------|-------------------------------------------------------|
| sid <sub>0</sub> | snp_pos <sub>0_0</sub>   snp_pos <sub>0_1</sub>   ... |
| sid <sub>1</sub> | snp_pos <sub>1_0</sub>   snp_pos <sub>1_1</sub>   ... |
| ⋮                |                                                       |

**G**

| key                 | value |
|---------------------|-------|
| suffix <sub>0</sub> |       |
| suffix <sub>1</sub> |       |
| ⋮                   |       |

**H**

| key                                                                        | value                                                                               |
|----------------------------------------------------------------------------|-------------------------------------------------------------------------------------|
| leftflank_len <sub>0</sub> :rightflank_len <sub>0</sub> :seed <sub>0</sub> | leftflank <sub>0_0</sub> +rightflank <sub>0_0</sub>   leftflank <sub>0_1</sub> +... |
| leftflank_len <sub>1</sub> :rightflank_len <sub>1</sub> :seed <sub>1</sub> | leftflank <sub>1_0</sub> +rightflank <sub>1_0</sub>   leftflank <sub>1_1</sub> +... |
| ⋮                                                                          |                                                                                     |

**Figure S2. Structures of indices used in MRPrimerW2.** There are two kinds of DBs, DB-1 and DB-2. DB-1 is for the search mode in DB sequences, and DB-2 is for the search mode in FASTA sequences, which contains six indices (A-F) and three indices (G, H), respectively. The structure of indices is composed of a key and value pair. In details, indices of the search mode in DB sequences consist of annotation index (A), valid primer index (B), top-1 primer pair index (C), probe index (D), metadata index (E) and SNP locus index (for human only) (F). (A) stores the whole annotation of genes including NCBI gene symbol, NCBI gene ID, GenBank accession number, GenBank alias and keywords, and the exon positions. The key is formatted as "searchtype:query." For example, when the user input is GenBank accession number, NM\_001101.3, the format is accession:NM\_001101.3. The value of the annotation index is an arbitrary unique integer for sequence (sid) that points to the key in the other indices (B-F). The key portion of indices of (B-E) can have sidset (a set of sid) referring to the multi-targets. (B) The valid primer index contains the primer sequence and position in the sequence of the sid. The key is formatted sid+primer\_length. Example key 1+18 contains candidate primers from sid 1 having length of 18. The value is a list of primer data with primer, sid, and pos (position) concatenating + tag. (C) The top-1 primer pair index contains pre-computed top-1 primer pairs for each target(s). The key is formatted as sid and the value is a list of primer data formatted f\_primer (forward primer), r\_primer (reverse primer), sid, f\_pos (forward position of f\_primer), r\_pos (reverse position of r\_primer) in the sequence sid, and score. (D) The key of the probe index is formatted as sid, and the value is the list of taqman+sid+pos. (E) The metadata index contains minimum and maximum value of the primer length, melting temperature, GC content, self-complementarity, 3' end self-complementarity, contiguous residue, stability and number of hairpin for sid. The index is used for checking the existence of valid primers for the query within the user-defined constraint. (F) The SNP locus index stores the whole SNP locus of each gene which has the heterozygosity greater than 0. For the search mode in FASTA sequences, (G) is an index for the 5' cross-hybridization filtering and the key contains the suffixes of all possible subsequences by removing a prefix of length four. The two indices of (H) are for single mismatch and two mismatches for the general cross-hybridization filtering. The key is formatted leftflank\_len (length of left flank), rightflank\_len (length of right flank), and seed concatenating : tag, and the value is formatted leftflank (left flank) and rightflank (right flank) concatenating + tag. The example of general cross-hybridization filtering is illustrated in Supplementary Figure S2.
